# Supplementary material
Source: Springer Nature journal article supplement (https://www.springermedizin.de/resource/supplementary/12865_2011_431_MOESM3_ESM.pdf/9427982)

**A**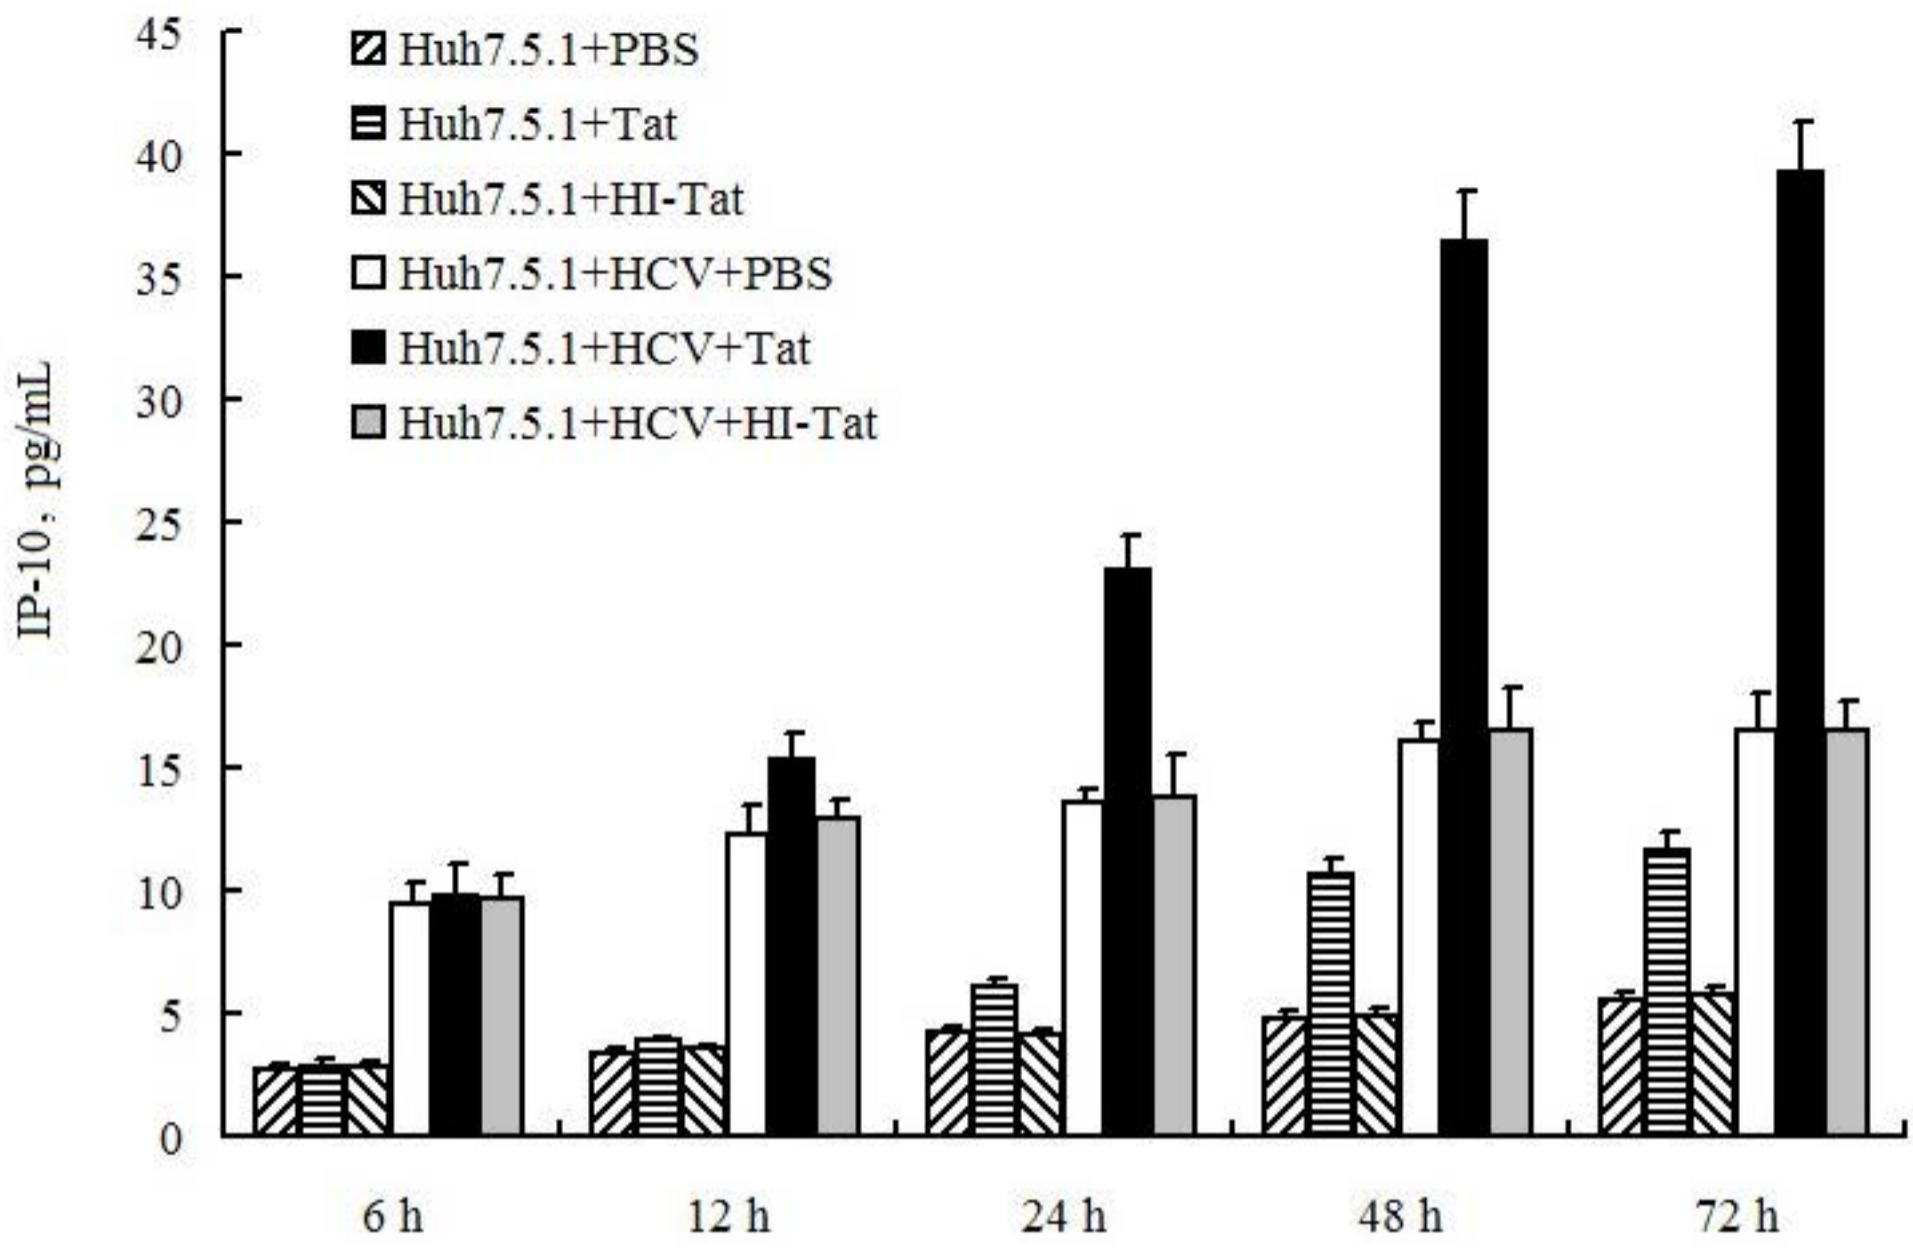**B**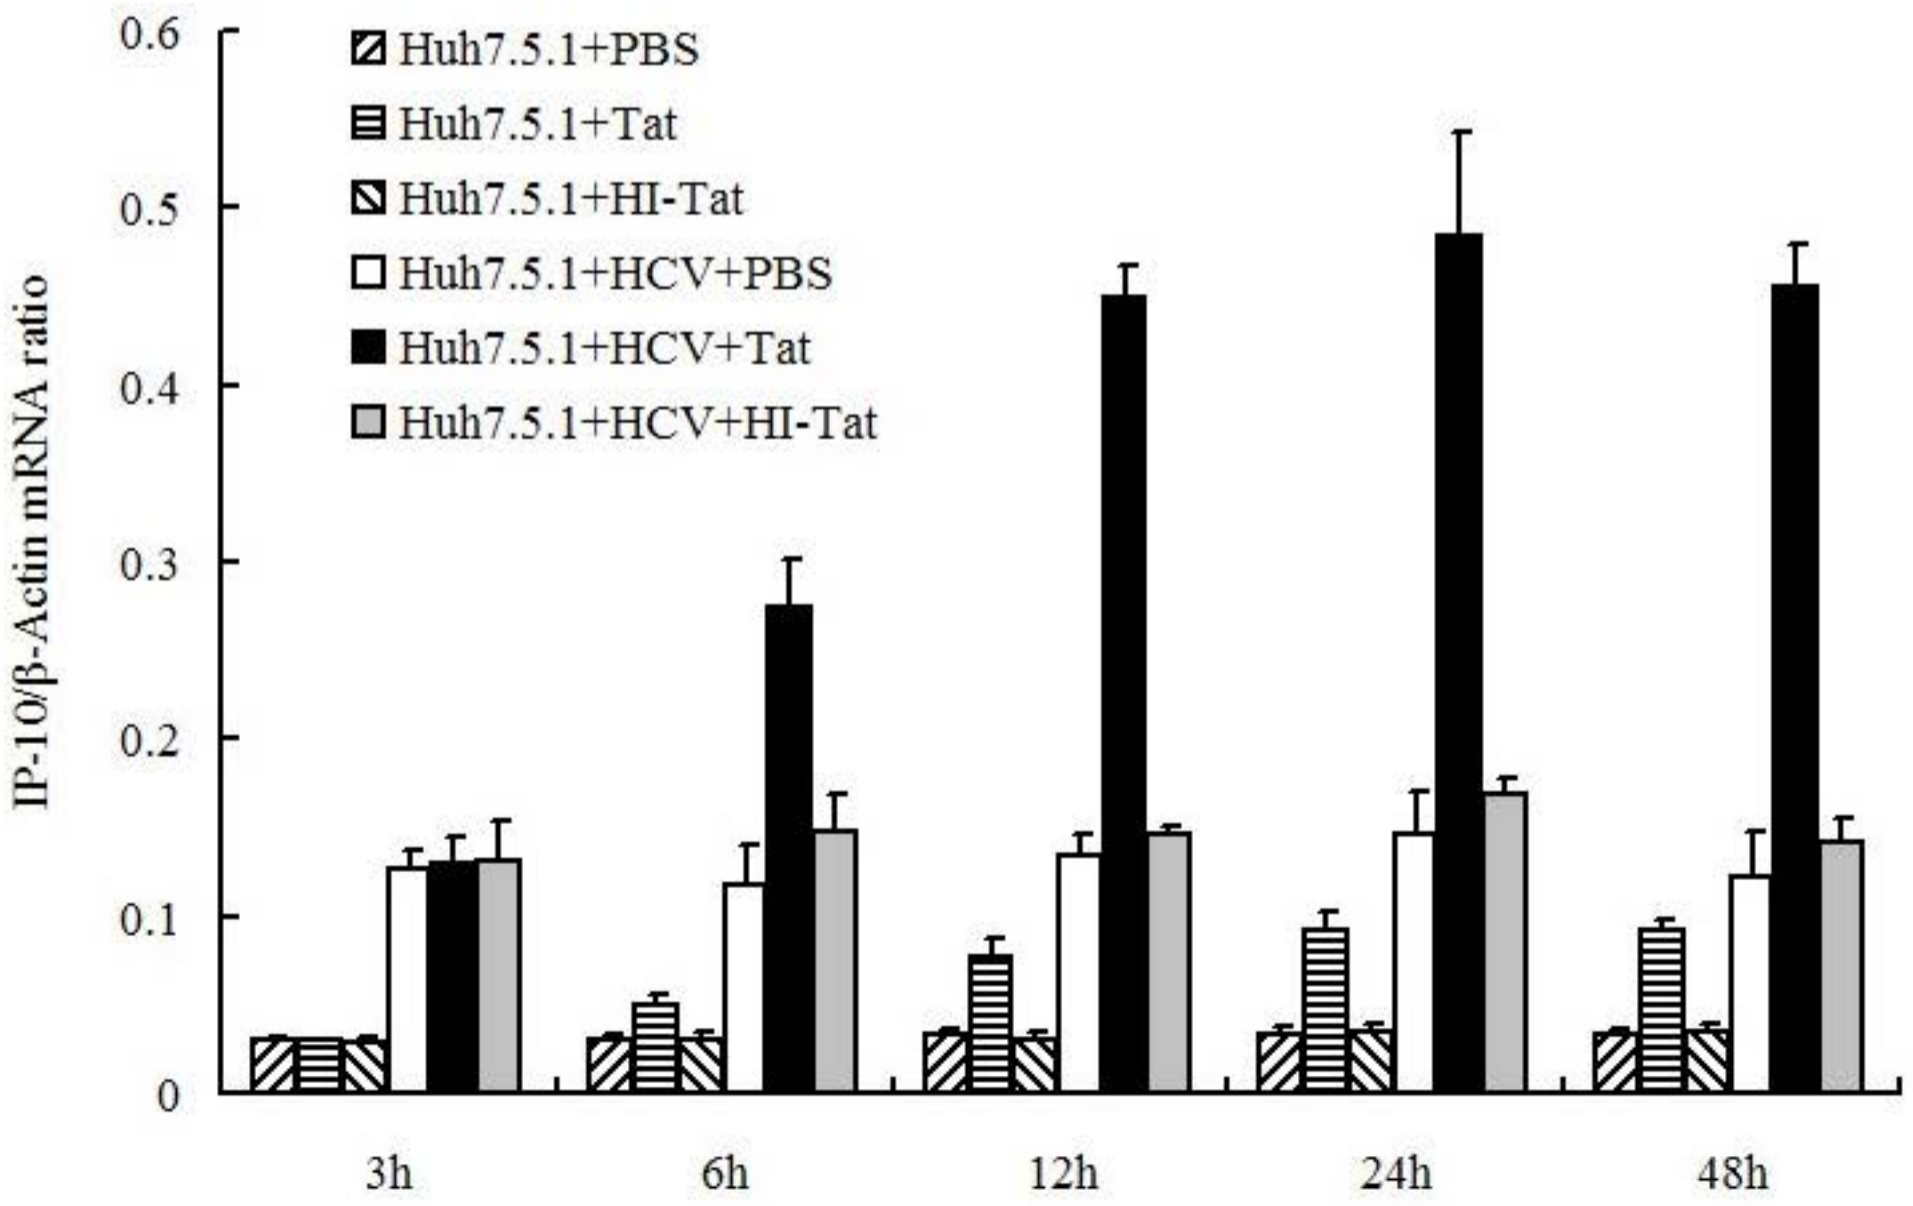

Supplement: MOESM3 [file 9427982]
